# Supplementary material for: MEF2C protects bone marrow B-lymphoid progenitors during stress haematopoiesis
Source: PubMed Central journal article supplement (PMC4987520; doi:10.1038/ncomms12376), 2016-08-10
Supplement: ncomms12376-s1.pdf [file ncomms12376-s1.pdf]

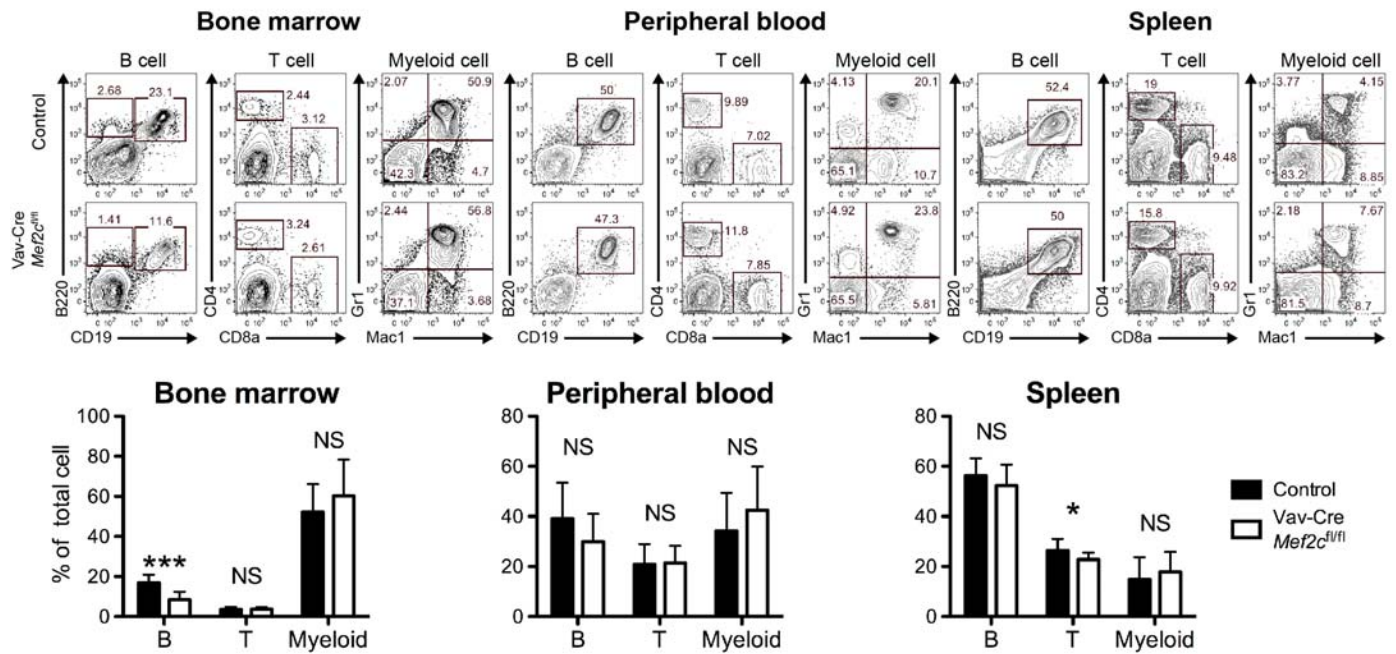

**Supplementary Figure 1. Loss of *Mef2c* affects the frequency of bone marrow B-lymphoid progenitors.** Deletion of *Mef2c* in haematopoietic cells in Vav-Cre *Mef2c<sup>fl/fl</sup>* mice resulted in specific reduction of bone marrow B cells, while the cellularity of blood and spleen B cells was unaffected (n≥7 mice). Representative flow cytometric analysis and quantification of haematopoietic lineages in bone marrow peripheral blood and spleen are shown. All mice were analyzed at 7-10 months of age and both male and female mice were included. Data shown are the mean ± SD of three or more independent experiments. NS not significant, \* P<0.05, \*\* P<0.01 and \*\*\* P<0.001, unpaired t-test.



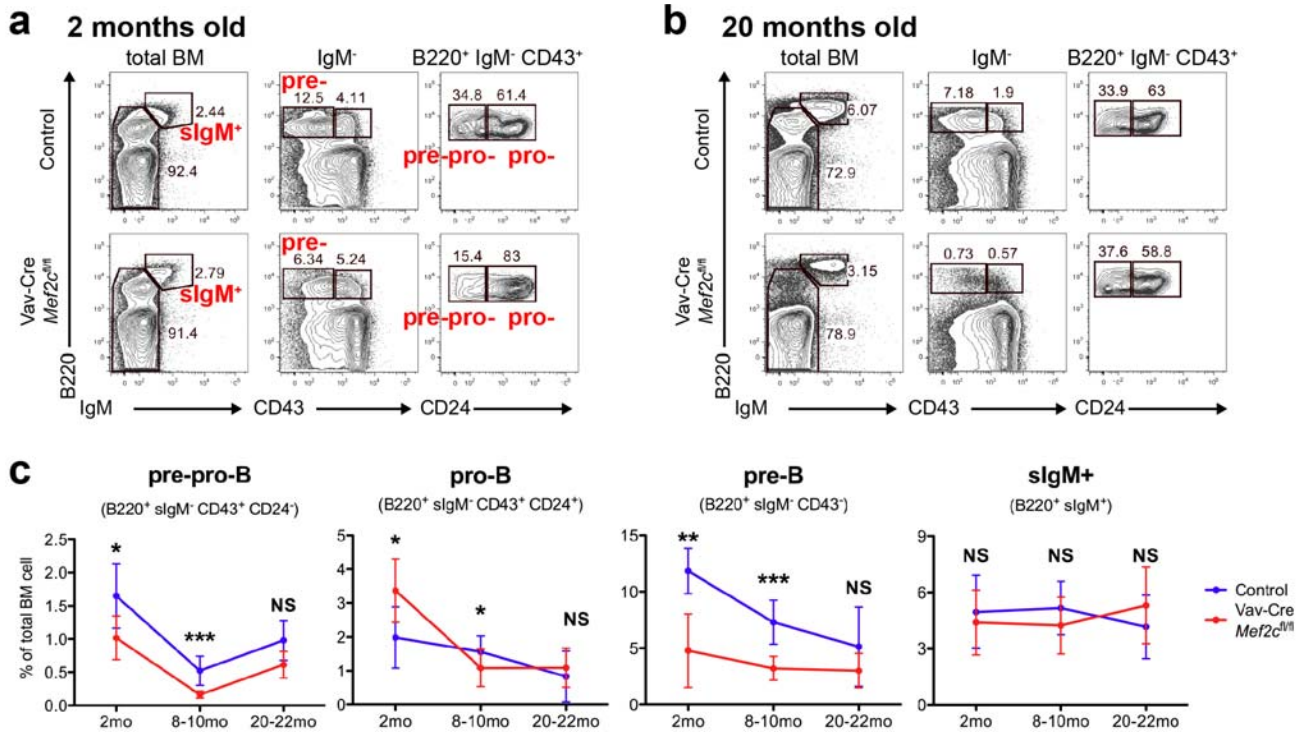

**Supplementary Figure 3. *Mef2c* deficiency results in decline of B-cell progenitors that resembles ageing. (a,b)** Representative flow cytometric analysis of bone marrow B-lymphoid progenitors from young (2 months) and old (20 months) mice. **(c)** Quantification of bone marrow B-lymphoid progenitors in *Mef2c* deficient and control mice of different ages shows that young/middle aged *Mef2c* deficient mice show similar reduction of bone marrow B-cell progenitors as observed in control mice during ageing ( $n \geq 6$ ). Both male and female mice were included. Data shown are the mean  $\pm$  SD of three or more independent experiments. NS not significant, \*  $P < 0.05$ , \*\*  $P < 0.01$  and \*\*\*  $P < 0.001$ , unpaired t-test.

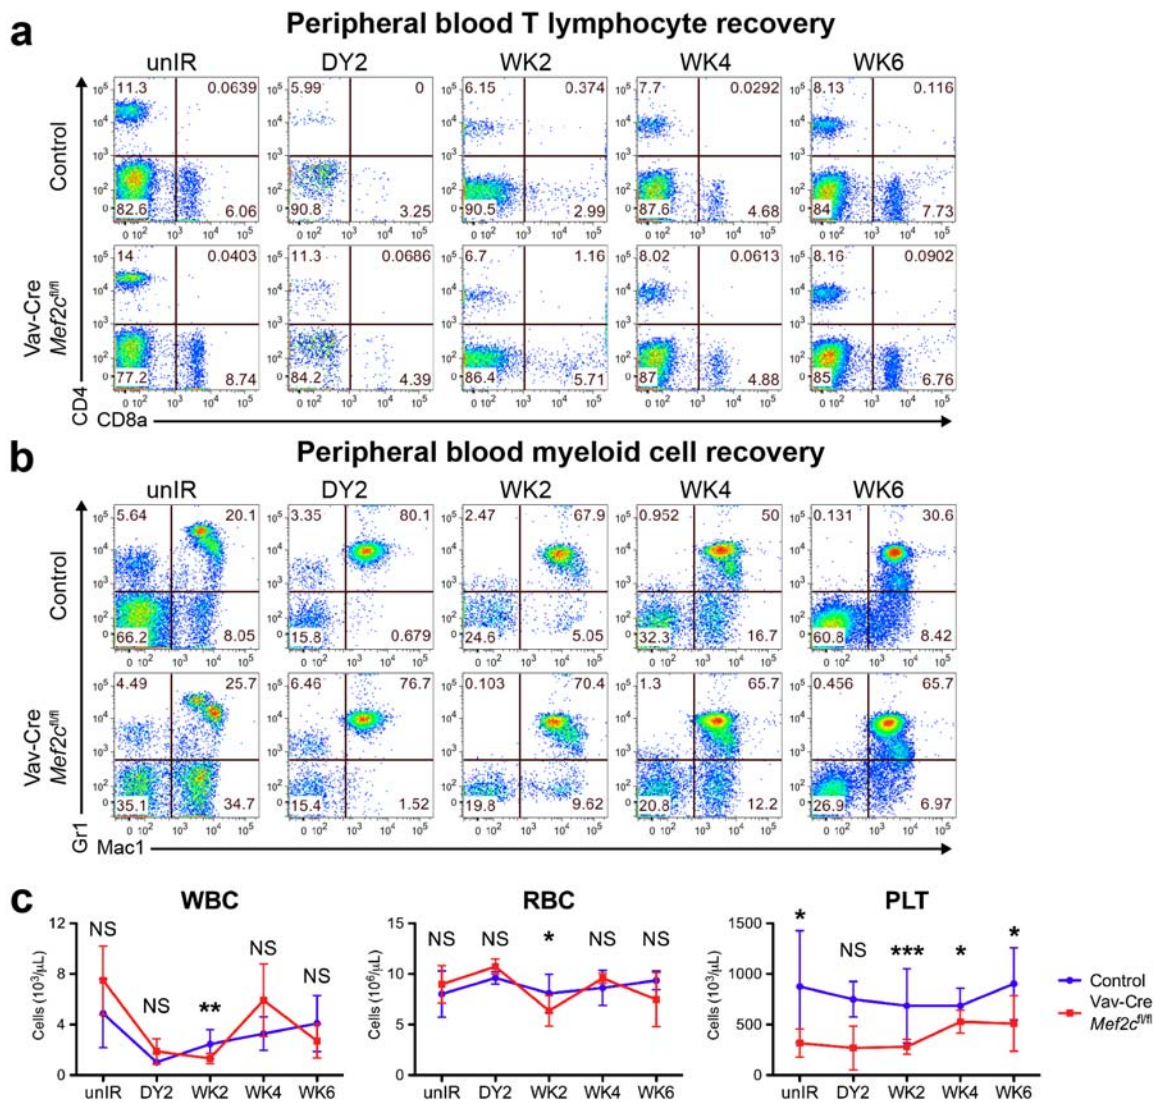

**Supplementary Figure 4. Recovery of most blood lineages is not affected in the absence of *Mef2c*.** (a,b) Representative flow cytometric analysis of peripheral blood T-lymphoid and myeloid cells shows comparable recovery in *Mef2c* deficient mice upon 6Gy sub-lethal irradiation as controls. (c) Quantification of peripheral blood white blood cell (WBC), red blood cell (RBC) and platelet (PLT) counts before and after 6Gy irradiation shows a significant defect in *Mef2c* deficient mice only in platelets, regardless of the presence of irradiation. All mice were analyzed at 7-11 months of age and both male and female mice were included. Day 2: n=4, data shown are the mean  $\pm$  SD of two independent experiments; other time points: n $\geq$ 5, data shown are the mean  $\pm$  SD of three or more independent experiments. NS not significant, \* P<0.05, \*\* P<0.01 and \*\*\* P<0.001, unpaired t-test.

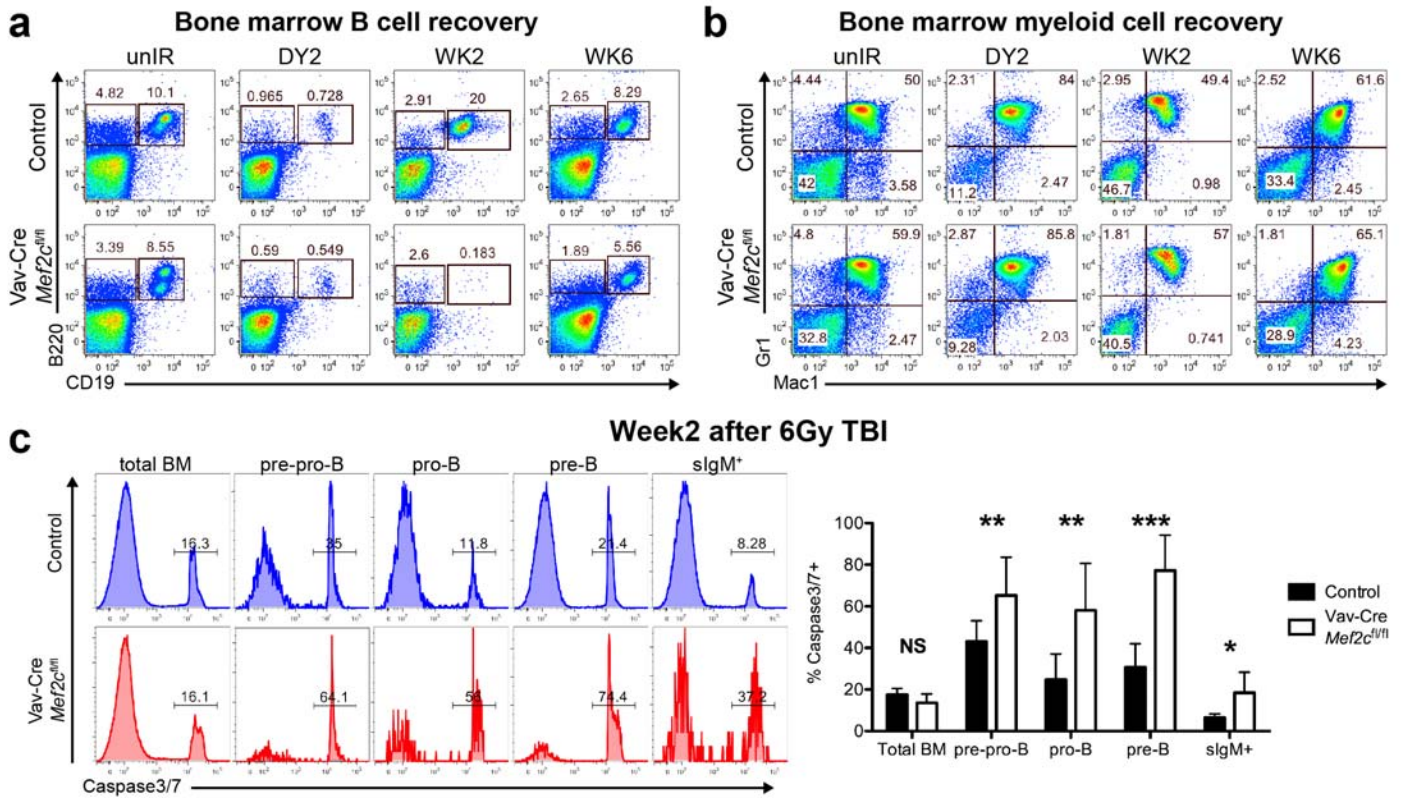

**Supplementary Figure 5. Loss of *Mef2c* affects the recovery of bone marrow B cells but not myeloid cells.** (a,b) Representative flow cytometric analysis of bone marrow B-lymphoid and myeloid cells shows that loss of *Mef2c* specifically compromises the recovery of bone marrow B-lymphoid cells while the recovery myeloid cells is unaffected. (c) Representative flow cytometric analysis and quantification of caspase3/7 activation in bone marrow B-lymphoid populations at week 2 after 6Gy irradiation (n≥5) shows compromised cell survival in *Mef2c* deficient B-lymphoid populations, but not total bone marrow cells. All mice were analyzed at 7-11 months of age and both male and female mice were included. Data shown are the mean ± SD of two or more independent experiments. NS not significant, \* P<0.05, \*\* P<0.01 and \*\*\* P<0.001, unpaired t-test.

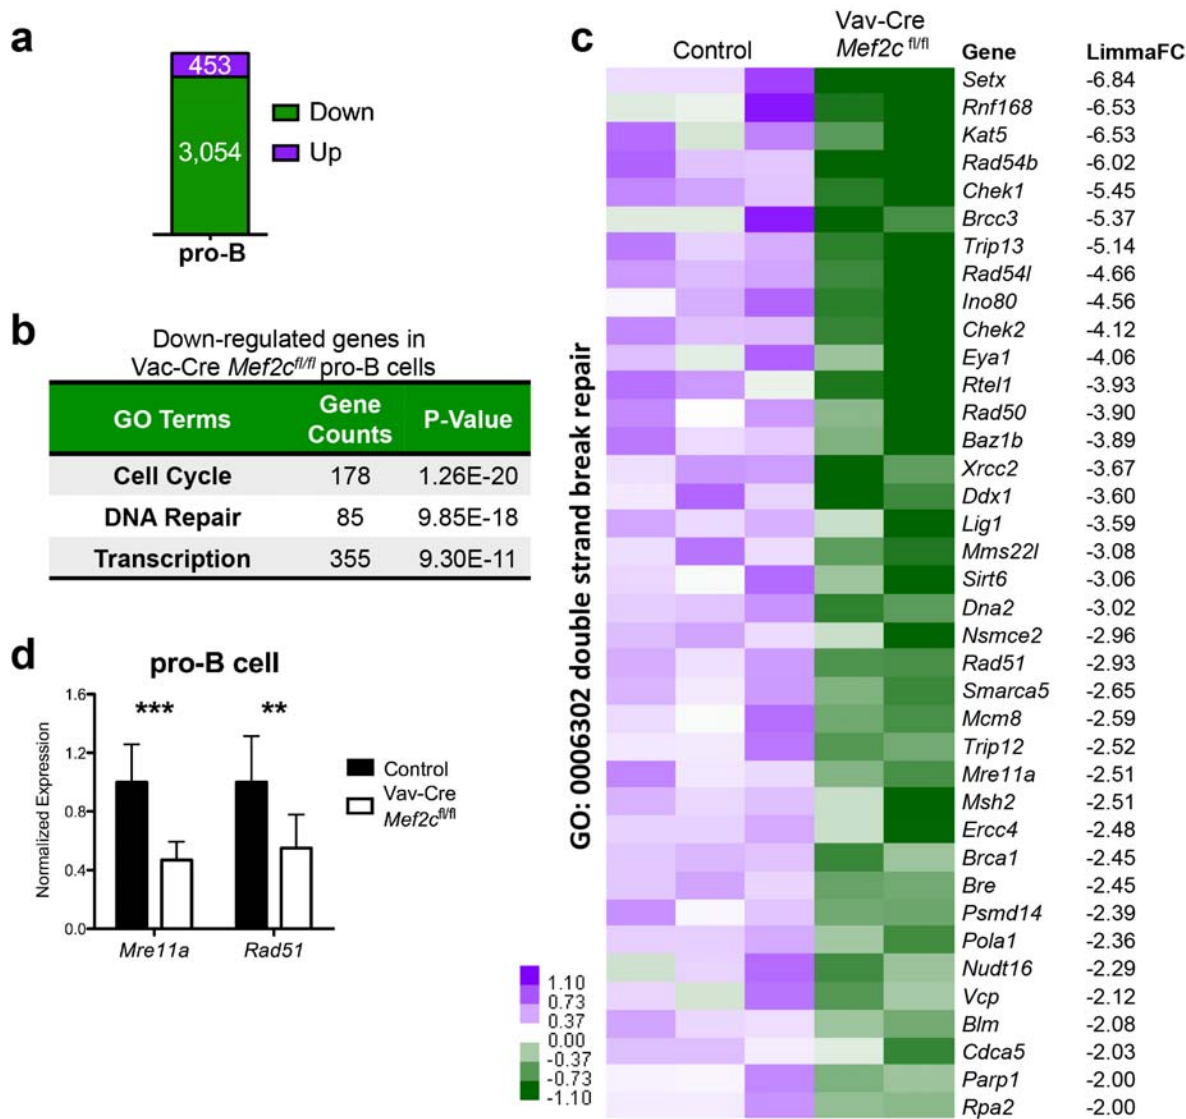

**Supplementary Figure 6. MEF2C regulates DNA repair pathways also in bone marrow pro-B cells.** (a) Microarray analysis of bone marrow pro-B cells from control and Vav-Cre *Mef2c<sup>fl/fl</sup>* mice (9 months old) identified 3,054 significantly ( $|FC| \geq 2$  and  $p \leq 0.05$ ) down-regulated and 453 up-regulated genes in the absence of *Mef2c* ( $n \geq 2$ ). (b) Cell cycle, DNA repair and transcription were among the most significant GO categories down-regulated also in *Mef2c* deficient pro-B cells. (c) DNA double strand break repair factors that are significantly down-regulated in *Mef2c* deficient pro-B cells are shown. (d) Q-PCR of key genes encoding DNA repair machinery validated defective expression in *Mef2c* deficient pro-B cells.  $n \geq 5$  mice, both male and female mice were included, and data shown are the mean  $\pm$  SD of two or more independent experiments. \*\*  $P < 0.01$  and \*\*\*  $P < 0.001$ , unpaired t-test.

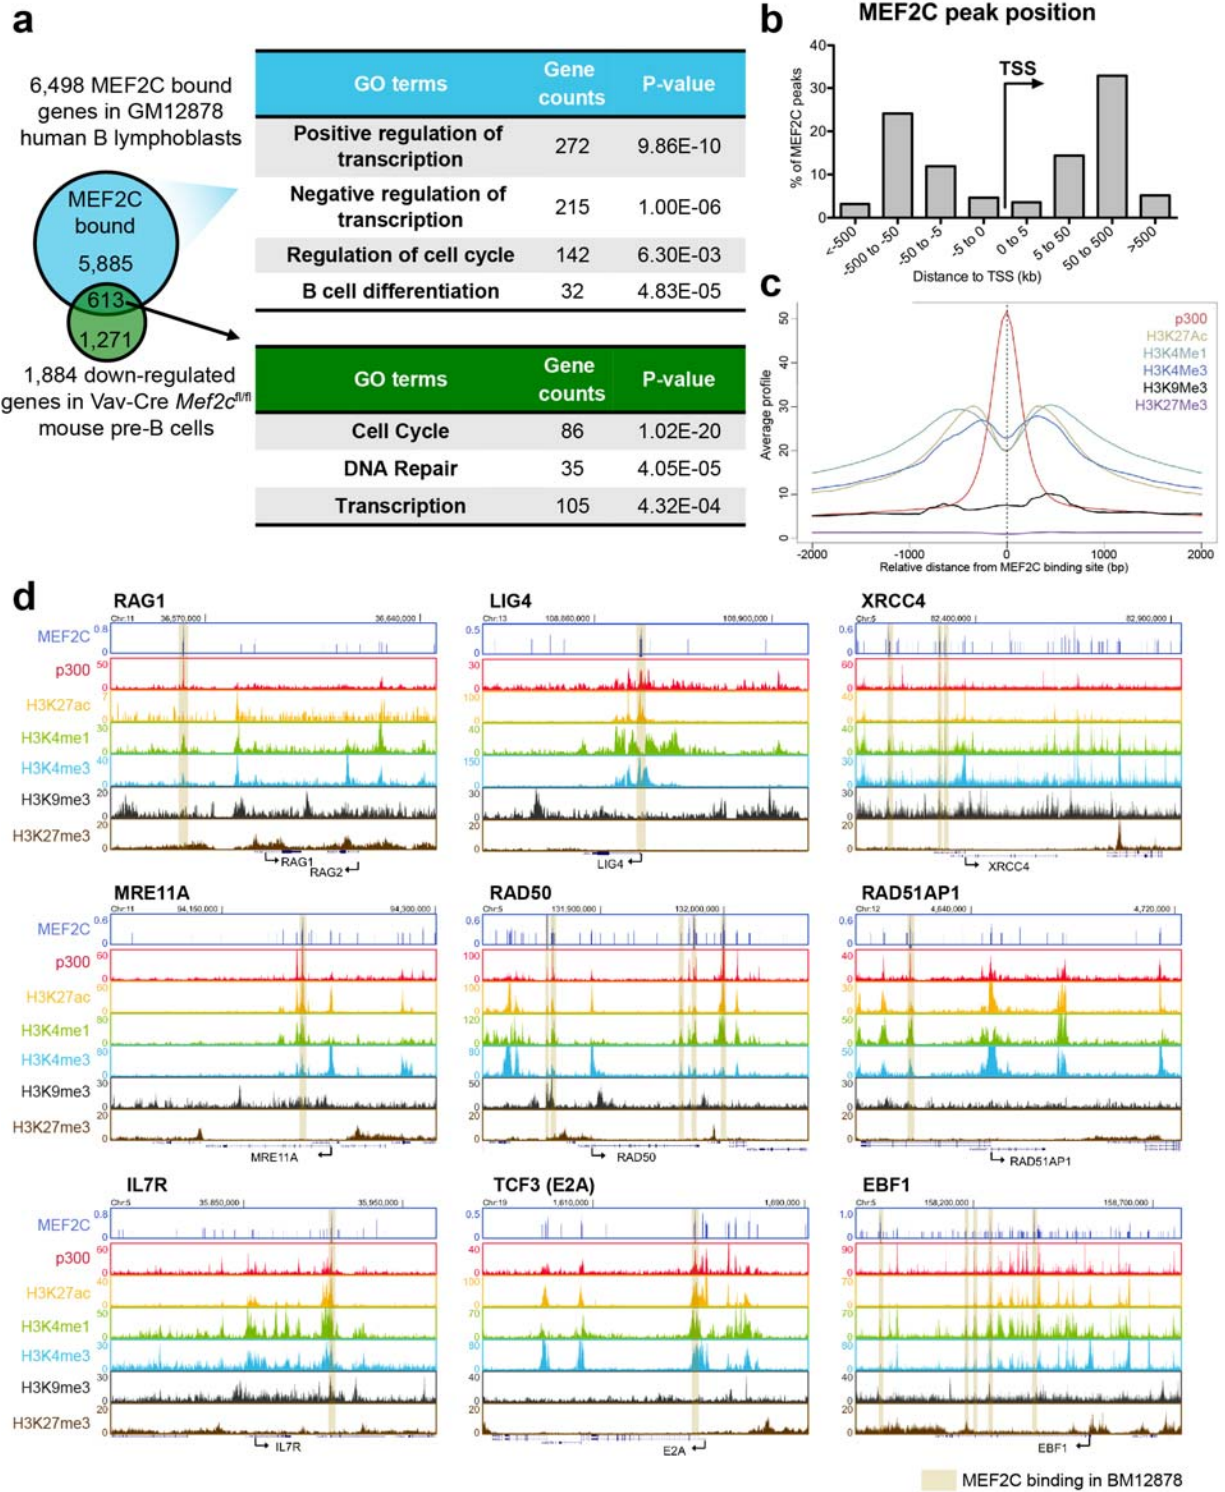

**Supplementary Figure 7. MEF2C binds to active DNA repair and V(D)J genes in human B-lymphoid cells.**(a) Intersection of MEF2C bound genes in human B-lymphoblasts and down-regulated genes in *Mef2c* deficient mouse bone marrow pre-B cells identified DNA repair regulators

as candidate direct targets of MEF2C in pre-B cells. **(b)** GREAT analysis showed that MEF2C binding sites are located both around TSS and at distant regulatory elements. **(c)** Distribution of co-activator p300 and epigenetic marks around MEF2C binding sites shows correlation of MEF2C peaks with both active enhancer and promoter marks (H3K4me1, H3K4me3, H3K27ac) but not repressive epigenetic marks (H3K9me3, H3K27me3). **(d)** Genome browser tracks show MEF2C and p300 binding and enrichment of active histone marks at genes encoding for DNA repair, V(D)J recombination and B-lymphoid factors. MEF2C peaks defined by the ENCODE dataset are highlighted in brown.





**Supplementary Table 1. List of antibodies used in the flow cytometric analysis in this paper.**

| <b>Antibody</b>        | <b>Flour</b> | <b>Clone</b> | <b>Dilution</b> | <b>Company</b> |
|------------------------|--------------|--------------|-----------------|----------------|
| B220                   | APC          | RA3-6B2      | 1:200           | BD Bioscience  |
| B220                   | APC Cy7      | RA3-6B2      | 1:200           | BD Bioscience  |
| B220                   | PerCP Cy5.5  | RA3-6B2      | 1:200           | eBioscience    |
| B220                   | PE           | RA3-6B2      | 1:200           | BD Bioscience  |
| CD19                   | PE           | 1D3          | 1:200           | BD Bioscience  |
| CD127 (Il7r $\alpha$ ) | PECy7        | A7R34        | 1:50            | eBioscience    |
| cKit                   | APC          | 2B8          | 1:200           | eBioscience    |
| Sca1                   | PECy7        | D7           | 1:200           | eBioscience    |
| AA4.1                  | PE           | AA4.1        | 1:200           | BD Bioscience  |
| CD135 (Flt3)           | Biotin       | A2F10        | 1:200           | eBioscience    |
| Gr1                    | APC          | RB6-8C5      | 1:200           | BD Bioscience  |
| Mac1                   | PE           | M1/70        | 1:200           | BD Bioscience  |
| CD4                    | APC          | RM4-5        | 1:200           | BD Bioscience  |
| CD8a                   | PE           | 53-6.7       | 1:200           | BD Bioscience  |
| IgD                    | FITC         | 11-26C.2A    | 1:200           | BD Bioscience  |
| IgM                    | PE           | R6-60.2      | 1:200           | BD Bioscience  |
| IgM                    | FITC         | II/41        | 1:200           | BD Bioscience  |
| CD43                   | FITC         | S7           | 1:200           | BD Bioscience  |
| CD43                   | Biotin       | S7           | 1:200           | BD Bioscience  |
| Streptavidin           | APC          | --           | 1:300           | Invitrogen     |
| CD24                   | PE Cy7       | M1/69        | 1:500           | BD Bioscience  |
| BP-1                   | Biotin       | 6C3          | 1:200           | eBioscience    |
| Ig- $\kappa$           | FITC         | 187.1        | 1:200           | BD Bioscience  |
| DAPI                   | --           | --           | 1:100           | AnaSpec        |
| 7AAD                   | --           | --           | 1:200           | BD Bioscience  |
| B220                   | PECy5        | RA3-6B2      | 1:200           | BD Bioscience  |
| Mac1                   | PECy5        | M1/70        | 1:200           | eBioscience    |
| Gr1                    | PECy5        | RB6-8C5      | 1:200           | eBioscience    |
| CD3                    | PECy5        | 145-2C11     | 1:200           | eBioscience    |
| Ter119                 | PECy5        | TER-119      | 1:200           | eBioscience    |

**Supplementary Table 2. List of primers used in the Q-PCR analysis in this paper.**

| <b>Gene</b>   | <b>Forward Primer</b> | <b>Reverse Primer</b> |
|---------------|-----------------------|-----------------------|
| <i>Actb</i>   | CATCGTGGGCCGCTCTAG    | GTAACAATGCCATGTTCAAT  |
| <i>Bcl2l1</i> | GGTGAGTCGGATTGCAAG    | GTTCCCGTAGAGATCCAC    |
| <i>Mre11a</i> | GCTCTCAGAGAGGCCGAG    | CCACCTCAATGGTCTCTG    |
| <i>Xrcc4</i>  | CCATTCAGCCTGGACTGC    | CAGTGCCTTTCTCAGCTC    |
| <i>Xrcc6</i>  | GATTGGGCGAGAGACAAG    | GACTCCCACTCTGACATG    |
| <i>Lig4</i>   | CTAGCTACCTGGGACCTG    | GCGACAACAAATCCTCCG    |
| <i>Rad51</i>  | CGAACTGGGAAGACACAG    | GTGTCAATGTACATGGCC    |
| <i>Ilf7r</i>  | CTTCAAAGGCTTCTGGAGC   | CTCAGAATGGTGACACTTG   |
| <i>Tcf3</i>   | CCAAACTGCTCATCCTGC    | CCGCTTCAAGCAGGCTGC    |
| <i>Ebf1</i>   | CCTCAATGGCTCAGCTGC    | TGAGACCATGTTGGCTG     |

#
